# Supplementary material for: Breast and Colorectal Cancer Screening Utilization after Hurricane María and the COVID-19 Pandemic in Puerto Rico
Source: MDPI journal article supplement (doi:10.3390/ijerph20196870), 2023-10-01
Supplement: s1 [file s1]

**Table S1.** CPT & HCPCS codes used in this study.

| Codes to Identify Cancer Screening | CPT & HCPCS Codes | Description                                                                                                                                      |
|------------------------------------|-------------------|--------------------------------------------------------------------------------------------------------------------------------------------------|
| Colorectal cancer screening        | 82270             | fecal occult blood test (FOBT)                                                                                                                   |
|                                    | 81528             | quantitative real-time target and signal amplification of 10 DNA markers                                                                         |
|                                    | G0328             | Fecal Immunochemical Testing (FIT)                                                                                                               |
|                                    | G0104             | flexible sigmoidoscopy                                                                                                                           |
|                                    | G0105             | colonoscopy on individual at high risk                                                                                                           |
|                                    | G0121             | colonoscopy on an individual not meeting criteria for high risk                                                                                  |
| Breast cancer screening            | G0464             | stool-based DNA and fecal occult hemoglobin                                                                                                      |
|                                    | 77057, 77067      | screening mammography, bilateral (2-view study of each breast)                                                                                   |
|                                    | G0202             | screening mammography, bilateral (2-view study of each breast), including computer-aided detection Computer-Aided Detection (CAD) when performed |
|                                    | 77063             | screening digital breast tomosynthesis                                                                                                           |

**Table S2.** Estimated Coefficients for the Poisson model to fit the number of claims for colorectal cancer screening controlling for year, month, age-group, sex, and number of beneficiaries.

| Parameter                         | Estimated Coefficient (95% CI) | SE   | Sig  |
|-----------------------------------|--------------------------------|------|------|
| <u>year (ref = 2016)</u>          |                                |      |      |
| 2017                              | 0.00 (-0.07, 0.07)             | 0.04 | 0.94 |
| 2018                              | -0.05 (-0.12, 0.02)            | 0.04 | 0.19 |
| 2019                              | 0.01 (-0.06, 0.08)             | 0.04 | 0.71 |
| 2020                              | -0.16 (-0.23, -0.09)           | 0.04 | 0.00 |
| 2021                              | -0.18 (-0.25, -0.11)           | 0.04 | 0.00 |
| <u>Month (ref = Jan)</u>          |                                |      |      |
| Feb                               | 0.29 (0.23, 0.35)              | 0.03 | 0.00 |
| Mar                               | 0.31 (0.25, 0.38)              | 0.03 | 0.00 |
| Apr                               | 0.40 (0.33, 0.46)              | 0.03 | 0.00 |
| Jun                               | 0.25 (0.18, 0.31)              | 0.03 | 0.00 |
| May                               | 0.25 (0.19, 0.31)              | 0.03 | 0.00 |
| Jul                               | -0.01 (-0.07, 0.06)            | 0.04 | 0.87 |
| Aug                               | 0.19 (0.12, 0.25)              | 0.03 | 0.00 |
| Sep                               | 0.10 (0.01, 0.15)              | 0.03 | 0.01 |
| Oct                               | 0.08 (-0.24, -0.10)            | 0.03 | 0.02 |
| Nov                               | -0.17 (-0.46, -0.31)           | 0.04 | 0.00 |
| Dec                               | -0.39 (0.03, 0.16)             | 0.04 | 0.00 |
| <u>Age groups (ref = 40-49)</u>   |                                |      |      |
| 50-59                             | 0.91 (0.89, 0.92)              | 0.01 | 0.00 |
| 60-64                             | 1.03 (1.02, 1.05)              | 0.01 | 0.00 |
| 65-69                             | 0.94 (0.91, 0.96)              | 0.01 | 0.00 |
| 70-74                             | 0.94 (0.91, 0.97)              | 0.02 | 0.00 |
| <u>Gender (ref = Female)</u>      |                                |      |      |
| Male                              | -0.23 (-0.24, -0.22)           | 0.01 | 0.00 |
| <u>Interaction (Year * Month)</u> |                                |      |      |
| 2017 * Feb                        | -0.06 (-0.15, 0.03)            | 0.05 | 0.00 |
| 2018 * Feb                        | -0.08 (-0.17, 0.01)            | 0.05 | 0.05 |
| 2019 * Feb                        | -0.11 (-0.21, -0.02)           | 0.05 | 0.00 |
| 2020 * Feb                        | 0.07 (-0.02, 0.17)             | 0.05 | 0.00 |
| 2021 * Feb                        | -0.02 (-0.11, 0.08)            | 0.05 | 0.00 |
| 2017 * Mar                        | 0.00 (-0.09, 0.09)             | 0.05 | 0.00 |
| 2018 * Mar                        | -0.08 (-0.17, 0.02)            | 0.05 | 0.15 |
| 2019 * Mar                        | -0.10 (-0.19, -0.01)           | 0.05 | 0.00 |
| 2020 * Mar                        | -0.52 (-0.62, -0.42)           | 0.05 | 0.00 |
| 2021 * Mar                        | 0.10 (0.01, 0.19)              | 0.05 | 0.00 |

|            |                      |      |      |
|------------|----------------------|------|------|
| 2017 * Apr | -0.29 (-0.38, -0.19) | 0.05 | 0.00 |
| 2018 * Apr | -0.09 (-0.18, 0.00)  | 0.05 | 0.00 |
| 2019 * Apr | -0.37 (-0.46, -0.28) | 0.05 | 0.00 |
| 2020 * Apr | -2.13 (-2.28, -1.98) | 0.08 | 0.13 |
| 2021 * Apr | -0.27 (-0.36, -0.17) | 0.05 | 0.00 |
| 2017 * May | -0.15 (-0.25, -0.06) | 0.05 | 0.18 |
| 2018 * May | 0.02 (-0.07, 0.11)   | 0.05 | 0.09 |
| 2019 * May | -0.27 (-0.37, -0.18) | 0.05 | 0.01 |
| 2020 * May | -1.03 (-1.14, -0.91) | 0.06 | 0.13 |
| 2021 * May | -0.15 (-0.24, -0.05) | 0.05 | 0.70 |
| 2017 * Jun | -0.23 (-0.33, -0.14) | 0.05 | 0.00 |
| 2018 * Jun | -0.09 (-0.18, 0.00)  | 0.05 | 0.80 |
| 2019 * Jun | -0.41 (-0.51, -0.31) | 0.05 | 0.00 |
| 2020 * Jun | -0.48 (-0.58, -0.38) | 0.05 | 0.19 |
| 2021 * Jun | -0.18 (-0.28, -0.09) | 0.05 | 0.18 |
| 2017 * Jul | -0.17 (-0.27, -0.07) | 0.05 | 0.00 |
| 2018 * Jul | 0.01 (-0.09, 0.11)   | 0.05 | 0.06 |
| 2019 * Jul | -0.28 (-0.38, -0.18) | 0.05 | 0.00 |
| 2020 * Jul | -0.07 (-0.17, 0.03)  | 0.05 | 0.00 |
| 2021 * Jul | -0.07 (-0.17, 0.03)  | 0.05 | 0.00 |
| 2017 * Aug | -0.20 (-0.3, -0.11)  | 0.05 | 0.99 |
| 2018 * Aug | -0.07 (-0.16, 0.02)  | 0.05 | 0.11 |
| 2019 * Aug | -0.40 (-0.50, -0.30) | 0.05 | 0.03 |
| 2020 * Aug | -0.26 (-0.36, -0.16) | 0.05 | 0.00 |
| 2021 * Aug | -0.30 (-0.40, -0.20) | 0.05 | 0.03 |
| 2017 * Sep | -1.07 (-1.18, -0.95) | 0.06 | 0.00 |
| 2018 * Sep | -0.13 (-0.23, -0.04) | 0.05 | 0.66 |
| 2019 * Sep | -0.44 (-0.54, -0.34) | 0.05 | 0.00 |
| 2020 * Sep | -0.15 (-0.25, -0.04) | 0.05 | 0.00 |
| 2021 * Sep | -0.24 (-0.35, -0.14) | 0.05 | 0.00 |
| 2017 * Oct | -1.49 (-1.62, -1.36) | 0.07 | 0.00 |
| 2018 * Oct | -0.12 (-0.21, -0.02) | 0.05 | 0.00 |
| 2019 * Oct | -0.30 (-0.40, -0.20) | 0.05 | 0.00 |
| 2020 * Oct | -0.05 (-0.15, 0.05)  | 0.05 | 0.00 |
| 2021 * Oct | -0.27 (-0.37, -0.17) | 0.05 | 0.00 |
| 2017 * Nov | -0.52 (-0.63, -0.41) | 0.06 | 0.00 |
| 2018 * Nov | -0.42 (-0.53, -0.31) | 0.06 | 0.02 |
| 2019 * Nov | -0.31 (-0.42, -0.20) | 0.05 | 0.00 |
| 2020 * Nov | -0.20 (-0.31, -0.09) | 0.06 | 0.30 |
| 2021 * Nov | -0.19 (-0.29, -0.08) | 0.06 | 0.00 |
| 2017 * Dec | -0.43 (-0.55, -0.32) | 0.06 | 0.00 |
| 2018 * Dec | -0.44 (-0.56, -0.32) | 0.06 | 0.01 |
| 2019 * Dec | -0.26 (-0.37, -0.15) | 0.06 | 0.00 |
| 2020 * Dec | -0.09 (-0.2, 0.03)   | 0.06 | 0.00 |
| 2021 * Dec | -0.22 (-0.33, -0.10) | 0.06 | 0.00 |

---

**Table S3.** Estimated Coefficients for the Poisson model to fit the number of claims for breast cancer screening controlling for year, month, age-group, and number of beneficiaries.

| Parameter                         | Estimated Coefficient (95% CI) | SE   | Sig  |
|-----------------------------------|--------------------------------|------|------|
| <u>year (ref = 2016)</u>          |                                |      |      |
| 2017                              | 0.18 (0.12, 0.24)              | 0.03 | 0.00 |
| 2018                              | 0.21 (0.15, 0.26)              | 0.03 | 0.00 |
| 2019                              | 0.16 (0.10, 0.22)              | 0.03 | 0.00 |
| 2020                              | 0.10 (0.04, 0.16)              | 0.03 | 0.00 |
| 2021                              | 0.24 (0.18, 0.30)              | 0.03 | 0.00 |
| <u>Month (ref = Jan)</u>          |                                |      |      |
| Feb                               | 0.37 (0.31, 0.42)              | 0.03 | 0.00 |
| Mar                               | 0.38 (0.32, 0.44)              | 0.03 | 0.00 |
| Apr                               | 0.46 (0.41, 0.52)              | 0.03 | 0.00 |
| Jun                               | 0.40 (0.34, 0.45)              | 0.03 | 0.00 |
| May                               | 0.46 (0.40, 0.52)              | 0.03 | 0.00 |
| Jul                               | 0.18 (0.13, 0.24)              | 0.03 | 0.00 |
| Aug                               | 0.47 (0.42, 0.53)              | 0.03 | 0.00 |
| Sep                               | 0.40 (0.34, 0.46)              | 0.03 | 0.00 |
| Oct                               | 0.64 (0.59, 0.69)              | 0.03 | 0.00 |
| Nov                               | 0.40 (0.34, 0.46)              | 0.03 | 0.00 |
| Dec                               | 0.23 (0.17, 0.29)              | 0.03 | 0.00 |
| <u>Age groups (ref = 50–59)</u>   |                                |      |      |
| 60–64                             | 0.03 (0.02, 0.04)              | 0.01 | 0.00 |
| 65–69                             | –0.20 (–0.22, –0.18)           | 0.01 | 0.00 |
| 70–74                             | –0.32 (–0.34, –0.30)           | 0.01 | 0.00 |
| <u>Interaction (Year * Month)</u> |                                |      |      |
| 2017 * Feb                        | –0.16 (–0.24, –0.08)           | 0.04 | 0.00 |
| 2018 * Feb                        | –0.08 (–0.15, 0.00)            | 0.04 | 0.06 |
| 2019 * Feb                        | –0.08 (–0.16, 0.00)            | 0.04 | 0.04 |
| 2020 * Feb                        | –0.02 (–0.10, 0.06)            | 0.04 | 0.67 |
| 2021 * Feb                        | –0.02 (–0.09, 0.06)            | 0.04 | 0.69 |
| 2017 * Mar                        | 0.03 (–0.05, 0.11)             | 0.04 | 0.43 |
| 2018 * Mar                        | 0.00 (–0.07, 0.08)             | 0.04 | 0.91 |
| 2019 * Mar                        | 0.09 (0.01, 0.17)              | 0.04 | 0.02 |
| 2020 * Mar                        | –0.62 (–0.71, –0.54)           | 0.04 | 0.00 |
| 2021 * Mar                        | 0.11 (0.04, 0.19)              | 0.04 | 0.00 |
| 2017 * Apr                        | –0.24 (–0.32, –0.17)           | 0.04 | 0.00 |
| 2018 * Apr                        | 0.02 (–0.06, 0.09)             | 0.04 | 0.65 |
| 2019 * Apr                        | –0.04 (–0.12, 0.04)            | 0.04 | 0.32 |
| 2020 * Apr                        | –3.09 (–3.27, –2.92)           | 0.09 | 0.00 |
| 2021 * Apr                        | –0.27 (–0.35, –0.19)           | 0.04 | 0.00 |
| 2017 * May                        | –0.07 (–0.15, 0.00)            | 0.04 | 0.07 |
| 2018 * May                        | 0.05 (–0.03, 0.13)             | 0.04 | 0.19 |
| 2019 * May                        | 0.02 (–0.06, 0.09)             | 0.04 | 0.65 |
| 2020 * May                        | –1.31 (–1.41, –1.21)           | 0.05 | 0.00 |
| 2021 * May                        | –0.25 (–0.33, –0.18)           | 0.04 | 0.00 |
| 2017 * Jun                        | –0.12 (–0.20, –0.04)           | 0.04 | 0.00 |
| 2018 * Jun                        | –0.10 (–0.18, –0.03)           | 0.04 | 0.01 |
| 2019 * Jun                        | –0.13 (–0.21, –0.05)           | 0.04 | 0.00 |
| 2020 * Jun                        | –0.56 (–0.64, –0.47)           | 0.04 | 0.00 |
| 2021 * Jun                        | –0.20 (–0.28, –0.13)           | 0.04 | 0.00 |
| 2017 * Jul                        | –0.09 (–0.17, 0.00)            | 0.04 | 0.04 |
| 2018 * Jul                        | 0.04 (–0.04, 0.12)             | 0.04 | 0.38 |
| 2019 * Jul                        | 0.02 (–0.06, 0.10)             | 0.04 | 0.58 |
| 2020 * Jul                        | –0.06 (–0.14, 0.02)            | 0.04 | 0.16 |
| 2021 * Jul                        | –0.04 (–0.11, 0.04)            | 0.04 | 0.38 |
| 2017 * Aug                        | –0.05 (–0.13, 0.02)            | 0.04 | 0.17 |
| 2018 * Aug                        | –0.04 (–0.12, 0.03)            | 0.04 | 0.26 |

|            |                      |      |      |
|------------|----------------------|------|------|
| 2019 * Aug | -0.13 (-0.21, -0.06) | 0.04 | 0.00 |
| 2020 * Aug | -0.25 (-0.33, -0.17) | 0.04 | 0.00 |
| 2021 * Aug | -0.25 (-0.32, -0.17) | 0.04 | 0.00 |
| 2017 * Sep | -1.20 (-1.29, -1.10) | 0.05 | 0.00 |
| 2018 * Sep | -0.20 (-0.28, -0.12) | 0.04 | 0.00 |
| 2019 * Sep | 0.01 (-0.06, 0.09)   | 0.04 | 0.71 |
| 2020 * Sep | -0.01 (-0.09, 0.07)  | 0.04 | 0.79 |
| 2021 * Sep | -0.15 (-0.23, -0.08) | 0.04 | 0.00 |
| 2017 * Oct | -1.79 (-1.88, -1.69) | 0.05 | 0.00 |
| 2018 * Oct | -0.29 (-0.36, -0.21) | 0.04 | 0.00 |
| 2019 * Oct | -0.03 (-0.10, 0.05)  | 0.04 | 0.47 |
| 2020 * Oct | -0.05 (-0.12, 0.03)  | 0.04 | 0.22 |
| 2021 * Oct | -0.30 (-0.37, -0.22) | 0.04 | 0.00 |
| 2017 * Nov | -0.87 (-0.95, -0.78) | 0.04 | 0.00 |
| 2018 * Nov | -0.83 (-0.91, -0.74) | 0.04 | 0.00 |
| 2019 * Nov | -0.16 (-0.24, -0.08) | 0.04 | 0.00 |
| 2020 * Nov | -0.15 (-0.23, -0.07) | 0.04 | 0.00 |
| 2021 * Nov | -0.16 (-0.24, -0.09) | 0.04 | 0.00 |
| 2017 * Dec | -0.46 (-0.54, -0.38) | 0.04 | 0.00 |
| 2018 * Dec | -0.60 (-0.69, -0.52) | 0.04 | 0.00 |
| 2019 * Dec | -0.26 (-0.34, -0.17) | 0.04 | 0.00 |
| 2020 * Dec | 0.04 (-0.04, 0.12)   | 0.04 | 0.34 |
| 2021 * Dec | -0.19 (-0.27, -0.11) | 0.04 | 0.00 |

---
